# Supplementary material
Source: bioRxiv or medRxiv preprint supplement (https://www.biorxiv.org/highwire/filestream/96629/field_highwire_adjunct_files/1/314922-10.pdf)

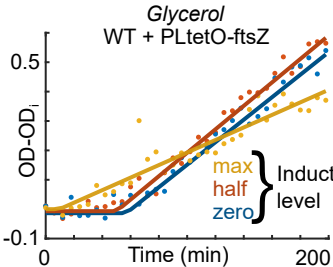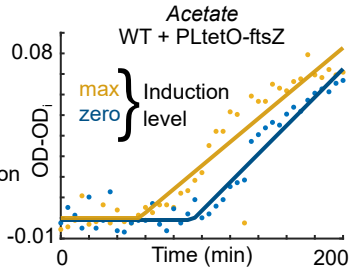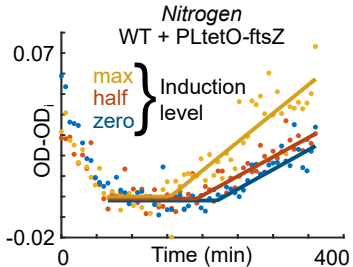

Supplement: Supplementary file [file 314922-10.pdf]
